# Supplementary material for: Decomposition of recalcitrant carbon under experimental warming in boreal forest
Source: PubMed Central journal article supplement (PMC5473569; doi:10.1371/journal.pone.0179674), 2017-06-16
Supplement: pone.0179674.s001.pdf [file pone.0179674.s001.pdf]

| <b>C fraction</b> | <b>Sampling time (months)</b> | <b>Control (mg)</b> | <b>Warmed (mg)</b>   |
|-------------------|-------------------------------|---------------------|----------------------|
| Lignin            | Initial                       | 287 ±15             |                      |
|                   | 1                             | 221 ±18             | 265 ±9               |
|                   | 2                             | 261 ±6              | 297 ±9               |
|                   | 12                            | 168 ±17             | 164 ±19              |
|                   | 16                            | 189 ±21             | 170 ±12              |
| Cellulose         | Initial                       | 312 ±14             |                      |
|                   | 1                             | 153 ±17             | 160 ±9               |
|                   | 2                             | 135 ±4              | 163 ±10 <sup>+</sup> |
|                   | 12                            | 69 ±5               | 95 ±5*               |
|                   | 16                            | 78 ±6               | 99 ±6*               |
| Hemicellulose     | Initial                       | 115 ±8              |                      |
|                   | 1                             | 19 ±2               | 29 ±3                |
|                   | 2                             | 36 ±3               | 39 ±3                |
|                   | 12                            | 14 ±2               | 12 ±3                |
|                   | 16                            | 9 ±2                | 8 ±1                 |
| Soluble sugars    | Initial                       | 21 ±1               |                      |
|                   | 1                             | 11 ±1               | 11 ±2                |
|                   | 2                             | 7 ±0                | 10 ±0*               |
|                   | 12                            | 3 ±0                | 4 ±0*                |
|                   | 16                            | 1 ±0                | 2 ±0 <sup>+</sup>    |

Values are mean ±SE, n = 5 plots. \*P < 0.05, <sup>+</sup>P < 0.10 between treatments.
